# Supplementary material
Source: publisher figshare collection journal article supplement (https://springernature.figshare.com/ndownloader/files/17476742)
Supplement: Supplementary file 1 [file 17476742]

Additional file for

Fabrication of surface-functionalized PUA composites to achieve superhydrophobicity

1Tian-Feng Hou, 1Arunkumar Shanmugasundaram, 1Bui Quoc Huy Nguyen,

1,2Dong-Weon Lee*

1MEMS and Nanotechnology Laboratory,

School of Mechanical Engineering, Chonnam National University,

Gwangju 61186, Republic of Korea

2Center for Next-generation Sensor Research and Development,

Chonnam National University,

Gwangju, 61186, Republic of Korea

Tel. no.: +82-62-530 1684. E-mail: [mems@jnu.ac.kr](mailto:mems@jnu.ac.kr).

*To whom all correspondence should be addressed

**Fig. S1.** The PDMS cross-linking polymerization reaction.


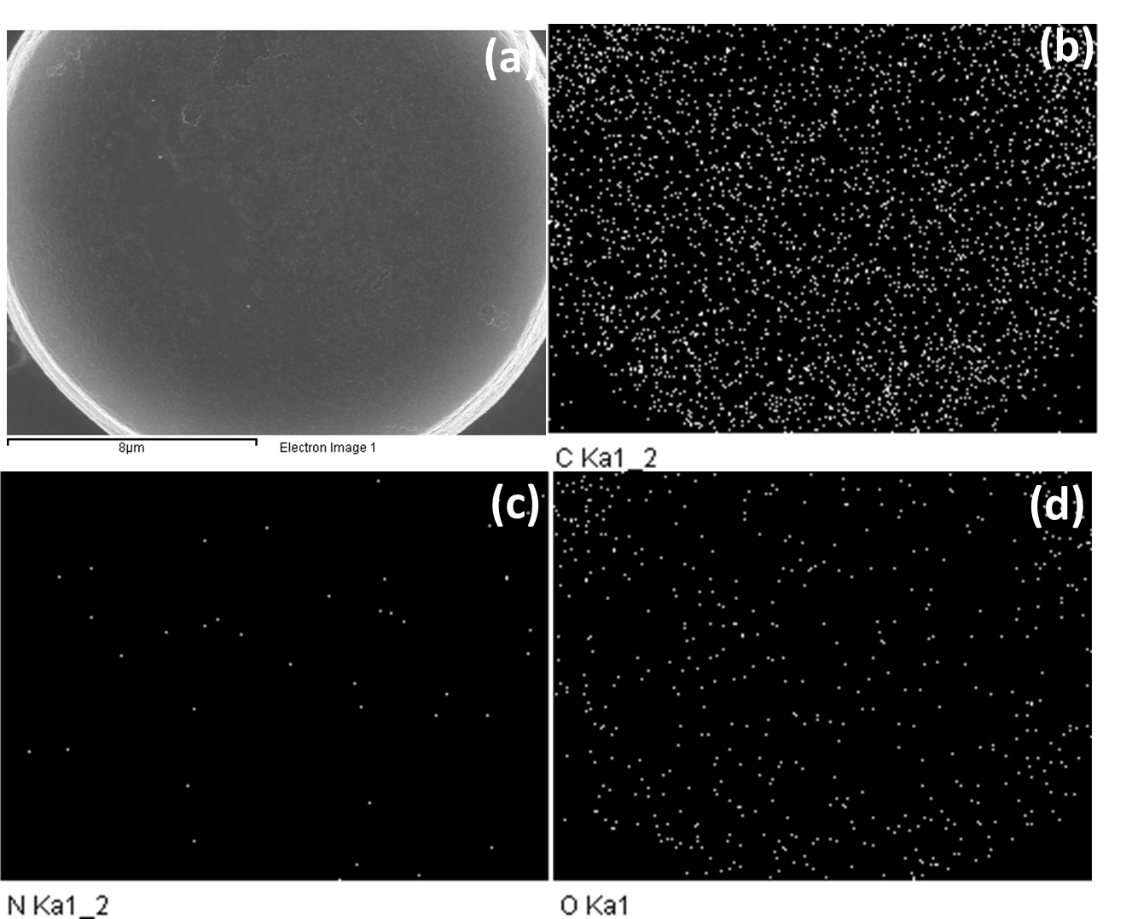


**Fig. S2.** Elemental analysis of the fabricated µ-patterned siloxane functionalized PUA (S-PUA). (a) Electron micrograph of µ-pillar top surface, elemental mapping of (b) carbon, (c) nitrogen and (d) oxygen.


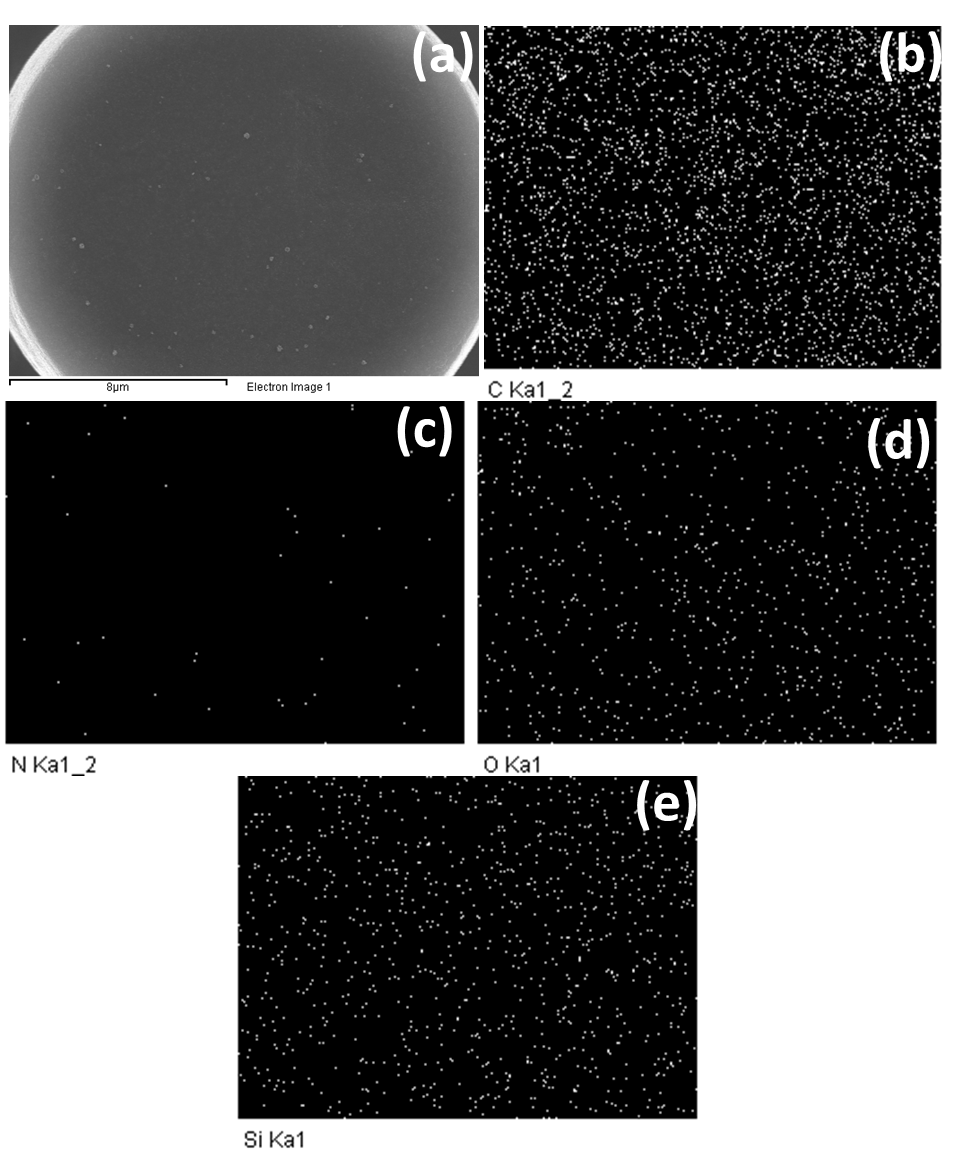


**Fig. S3.** Elemental analysis of the fabricated µ-patterned siloxane functionalized PG (S-PG). (a) electron micrograph of µ-pillar top surface, elemental mapping of (b) carbon, (c) nitrogen, (d) oxygen and (e) silicon.





**Fig. S4.** The water advancing contact angle (WACA), water receding contact angle (WRCA) and sliding angle (SA) of the siloxane functionalized GO incorporated PUA composite (S-PG) film as a function of µ-pillar distance, (n=5, mean ± standard deviation)


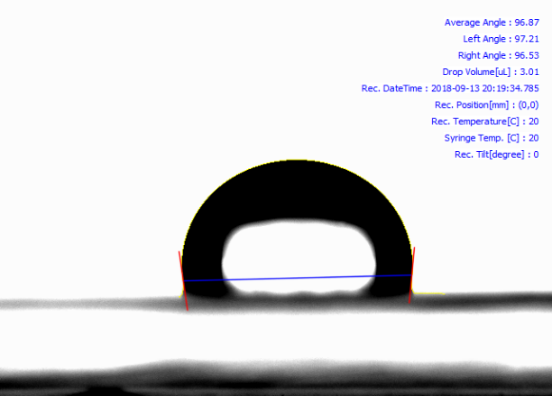


**Fig. S5.** Photograph of a water droplet on the surface of the siloxane functionalized flat PG (S-F-PG).





**Fig. S6.** The UV-DRS spectra of the fabricated siloxane functionalized-µ-patterned PG (S-PG) film.
